# Supplementary material for: Improvement of Hyperlipidemia by Aerobic Exercise in Mice through a Regulatory Effect of miR-21a-5p on its Target Genes
Source: Research Square preprint supplement (doi:10.21203/rs.3.rs-132701/v1), 2021-01-13
Supplement: Supplementary file 1 [file 89352d446e59d247bca10dd9.docx]

**Supplementary Date**

**Improvement of** **hyperlipidemia by aerobic exercise in mice through a regulatory effect of miR-21a-5p on its target genes**

Jinfeng Zhao1, Yaxin Wang2, Anping Chen1, Yu Zeng1, Feng Yan1, Longchang Chen1, Baoai Wu1

1 Department of Exercise Physiology, Shanxi University, Taiyuan, Shanxi, China

2 Department of Exercise Physiology, Beijing Sports University, Beijing, China

**Short title:** Exercise improves hyperlipidemia by upregulating miR-21a-5p

**Address correspondence to**: Baoai Wu, School of Shanxi university, Sports and educiation College, No. 92, Wucheng Road, Xiaodian District, Taiyuan City 030000, Shanxi Province, China, Tel: 86-15035168548; E-mail: [469203910@qq.com](mailto:469203910@qq.com)


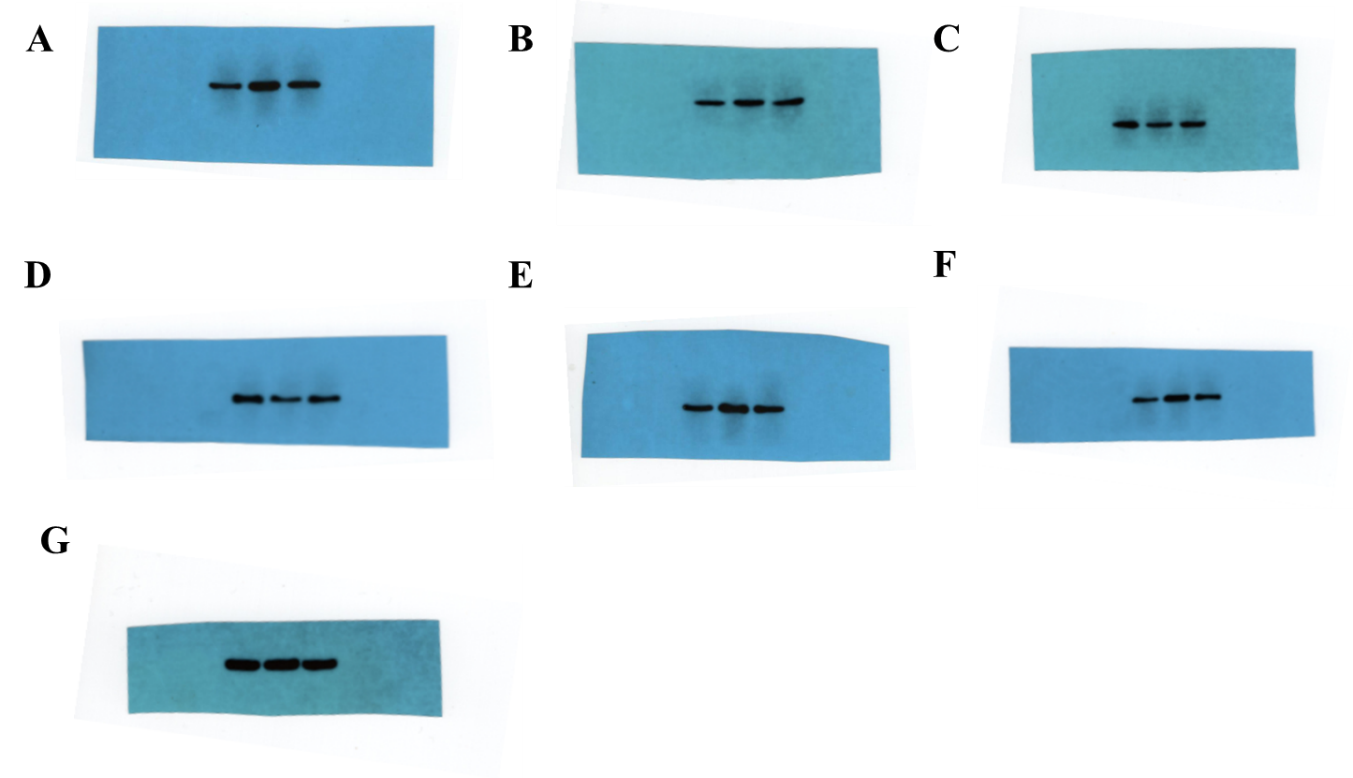


Supplementary Figure. Original western blot gel figures. (A) FABP7, (B) HMGCR, (C) PPARα, (D) PTEN, (E) ACAT1, (F) OLR1.
